# Supplementary material for: Characterization and Comparison of Intestinal Bacterial Microbiomes of Euschistus heros and Piezodorus guildinii Collected in Brazil and the United States
Source: PubMed Central journal article supplement (PMC8579040; doi:10.3389/fmicb.2021.769965), 2021-10-27
Supplement: Data_Sheet_1.pdf [file Data_Sheet_1.pdf]

# Characterization and comparison of intestinal bacterial microbiomes of *Euschistus heros* and *Piezodorus guildinii* collected in Brazil and the United States

Matheus Sartori Moro<sup>1,2,Ψ,\*</sup>, Xing Wu<sup>3,Ψ</sup>, Wei Wei<sup>3</sup>, Lucas William Mendes<sup>4</sup>, Kerry Clint Allen<sup>5</sup>, José Baldin Pinheiro<sup>6</sup>, Steven John Clough<sup>3,7</sup>, Maria Imaculada Zucchi<sup>2,8\*</sup>

## Supplementary material

**Table 1.** Collected samples.

| Species                     | Location                 | Latitude | Longitude |
|-----------------------------|--------------------------|----------|-----------|
| <i>Euschistus heros</i>     | Anhembi/SP - BR          | -22.789  | -48.128   |
|                             | Canarana/MT - BR         | -13.539  | -52.164   |
|                             | Palmeirante/TO - BR      | -7.8615  | -47.927   |
|                             | Piracicaba/SP - BR       | -22.725  | -47.648   |
|                             | Ponta Grossa/PR - BR     | -25.095  | -50.163   |
|                             | Rio Verde/GO - BR        | -17.797  | -50.900   |
|                             | Sinop/MG - BR            | -11.873  | -55.498   |
|                             | Sorriso/MG - BR          | -12.559  | -55.714   |
|                             | Teresina/PI - BR         | -5.0892  | -42.802   |
|                             | Uberlândia/MG - BR       | -18.911  | -48.262   |
| <i>Piezodorus guildinii</i> | Anhembi/SP - BR          | -22.789  | -48.128   |
|                             | Leland/MS - USA          | 33.404   | -90.891   |
|                             | Leopoldo Bulhões/GO - BR | -16.615  | -48.740   |
|                             | Rolling Fork/MS - USA    | 32.907   | -90.877   |
|                             | Uberlandia/MG - BR       | -18.911  | -48.262   |
|                             | Vicksburg/MS - USA       | 32.317   | -90.887   |
|                             | Washinton C./MS - USA    | 38.277   | -89.350   |
|                             | Woodville/MS - USA       | 31.069   | -91.308   |

**Table 2.** Quality control of reads and samples.

| Species                     | Location                 | Sample number before filtering | Samples number after filtering | Mean number of raw reads | Mean number of reads after filtering | Mean percentage after filtering |  |
|-----------------------------|--------------------------|--------------------------------|--------------------------------|--------------------------|--------------------------------------|---------------------------------|--|
| <i>Euschistus heros</i>     | Anhembi/SP - BR          | 10                             | 6                              | 39,695                   | 28,848                               | 70%                             |  |
|                             | Canarana/MT - BR         | 10                             | 9                              | 27,976                   | 18,604                               | 69%                             |  |
|                             | Palmeirante/TO - BR      | 10                             | 8                              | 8,858                    | 4,659                                | 49%                             |  |
|                             | Piracicaba/SP - BR       | 21                             | 12                             | 48,362                   | 38,416                               | 59%                             |  |
|                             | Ponta Grossa/PR - BR     | 10                             | 6                              | 7,973                    | 4,406                                | 34%                             |  |
|                             | Rio Verde/GO - BR        | 7                              | 4                              | 5,725                    | 2,763                                | 49%                             |  |
|                             | Sinop/MG - BR            | 10                             | 9                              | 7,302                    | 3,301                                | 37%                             |  |
|                             | Sorriso/MG - BR          | 10                             | 9                              | 14,740                   | 9,587                                | 52%                             |  |
|                             | Teresina/PI - BR         | 10                             | 8                              | 53,929                   | 40,878                               | 72%                             |  |
|                             | Uberlândia/MG - BR       | 9                              | 7                              | 31,136                   | 22,111                               | 73%                             |  |
| <i>Piezodorus guildinii</i> | Anhembi/SP - BR          | 29                             | 20                             | 33,507                   | 24,751                               | 66%                             |  |
|                             | Leland/MS - USA          | 17                             | 17                             | 13,727                   | 10,139                               | 59%                             |  |
|                             | Leopoldo Bulhões/GO - BR | 14                             | 12                             | 21,221                   | 14,279                               | 55%                             |  |
|                             | Rolling Fork/MS - USA    | 37                             | 33                             | 19,117                   | 15,708                               | 60%                             |  |
|                             | Uberlandia/MG - BR       | 6                              | 2                              | 8,611                    | 4,181                                | 34%                             |  |
|                             | Vicksburg/MS - USA       | 4                              | 0                              | 3,456                    | 1,481                                | 33%                             |  |
|                             | Washinton C./MS - USA    | 61                             | 38                             | 36,963                   | 33,413                               | 60%                             |  |
|                             | Woodville/MS - USA       | 11                             | 11                             | 7,347                    | 4,365                                | 43%                             |  |
|                             | <b>Total</b>             |                                | 286                            | 192                      | 7,551,148                            | 4,157,241                       |  |

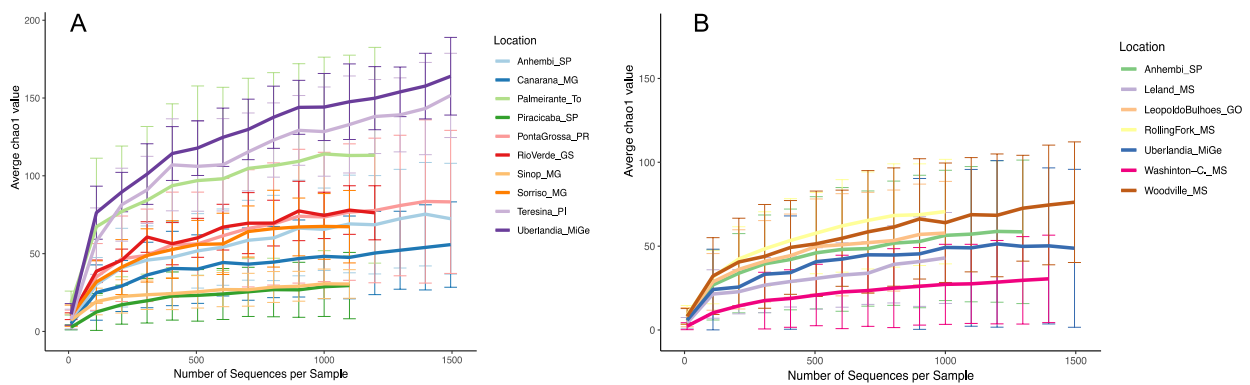

**Figure 1.** Rarefaction analyses using chao1 index of alpha diversity for *E. heros* (A) and *P. guildinii* (B).

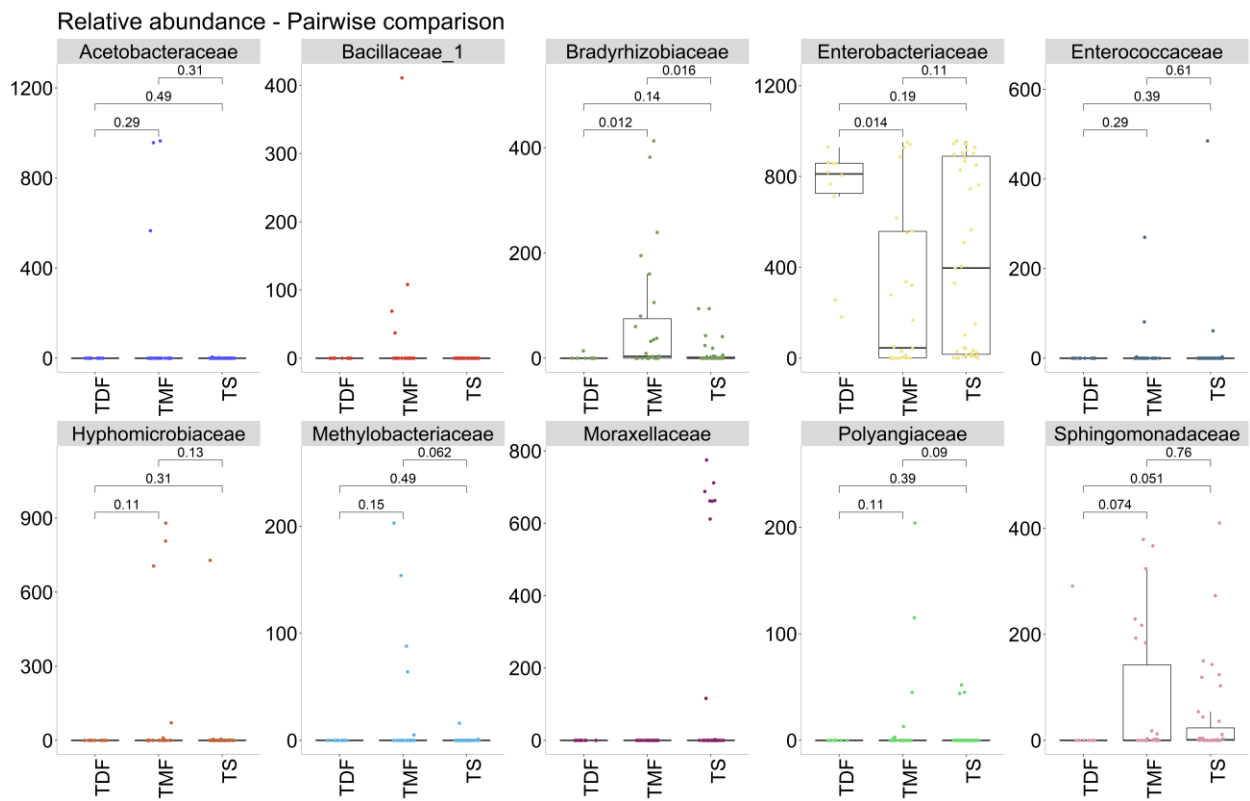

**Figure 2.** Abundance analysis of each bacteria family in the intestinal microbiome of *E. heros* collected in Brazil, classified by ecoregion. Pairwise comparison (Wilcoxon) is indicated between ecoregions.

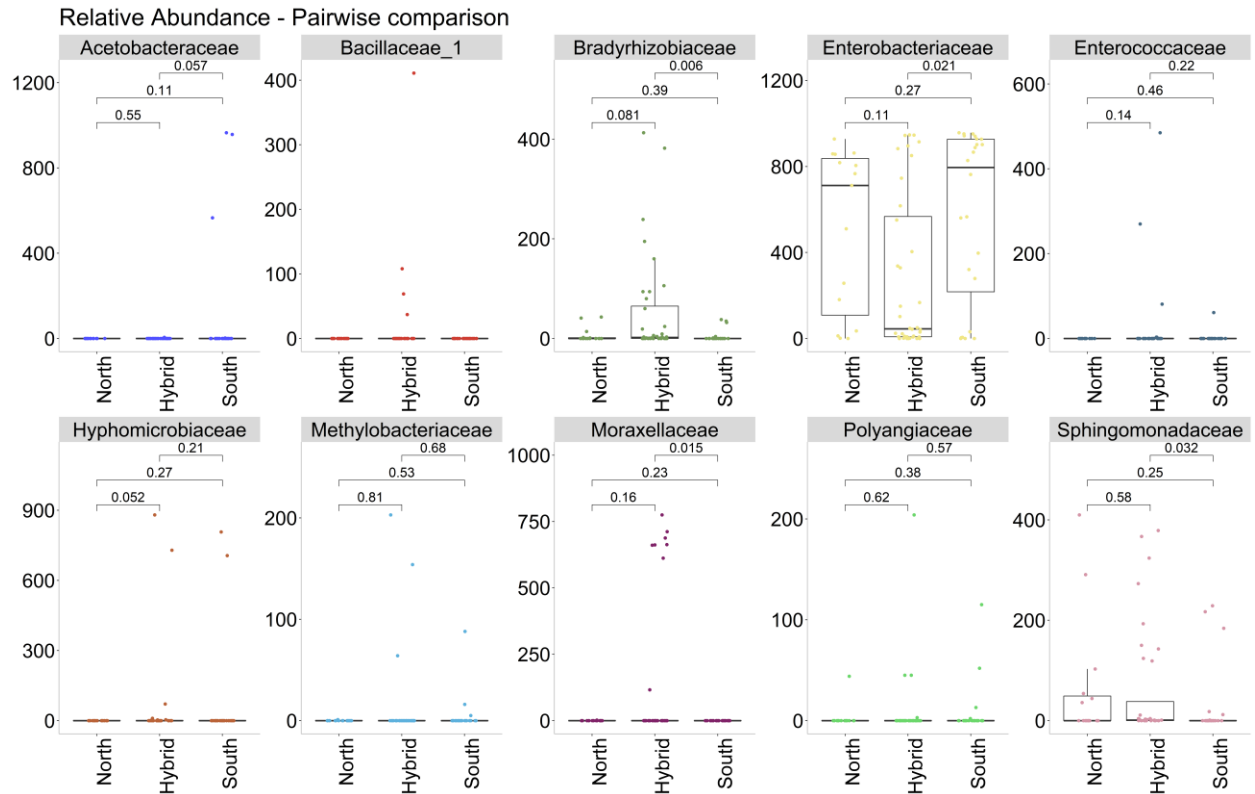

**Figure 3.** Abundance analysis of each bacteria family in the intestinal microbiome of *E. heros* collected in Brazil, classified by lineages. Pairwise comparison (Wilcoxon) is indicated between lineages.

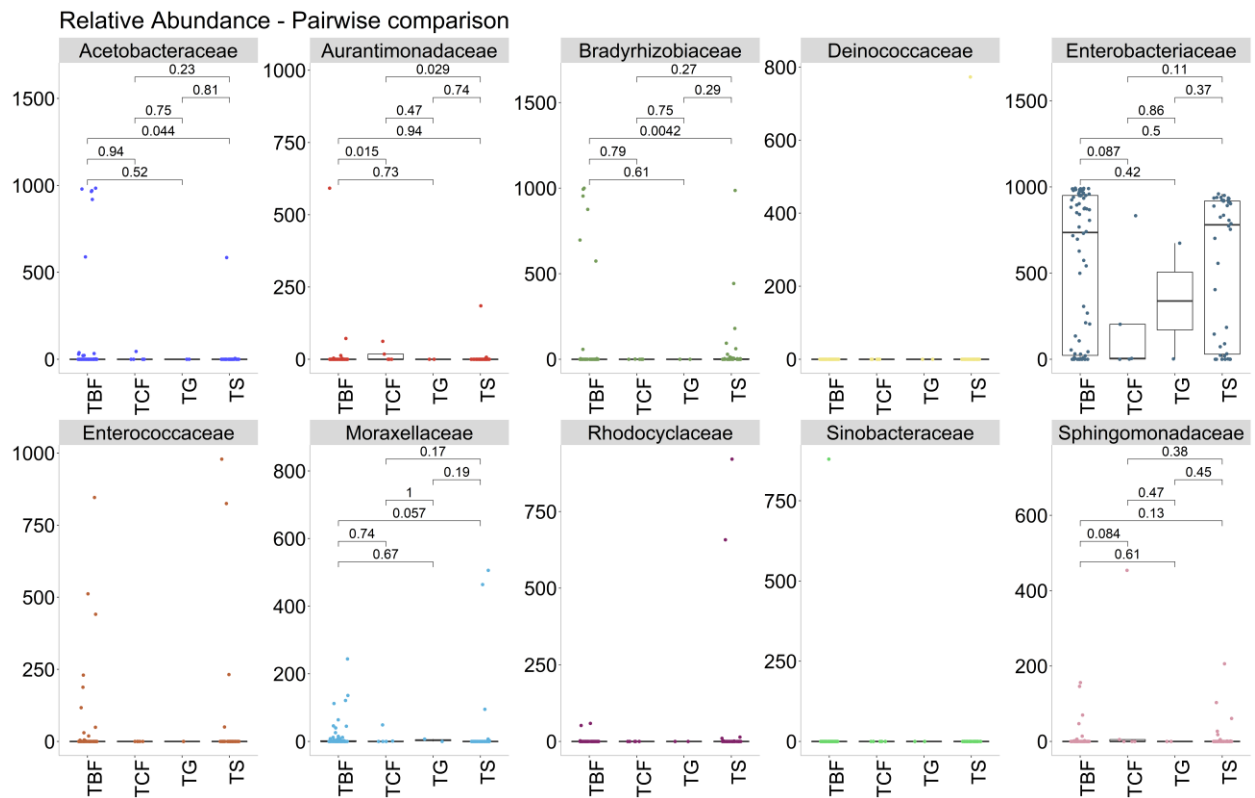

**Figure 4.** Abundance analysis of each bacteria family in the intestinal microbiome of *P. guildinii* collected in Brazil and the United States, classified by ecoregion. Pairwise comparison (Wilcoxon) is indicated between ecoregions.

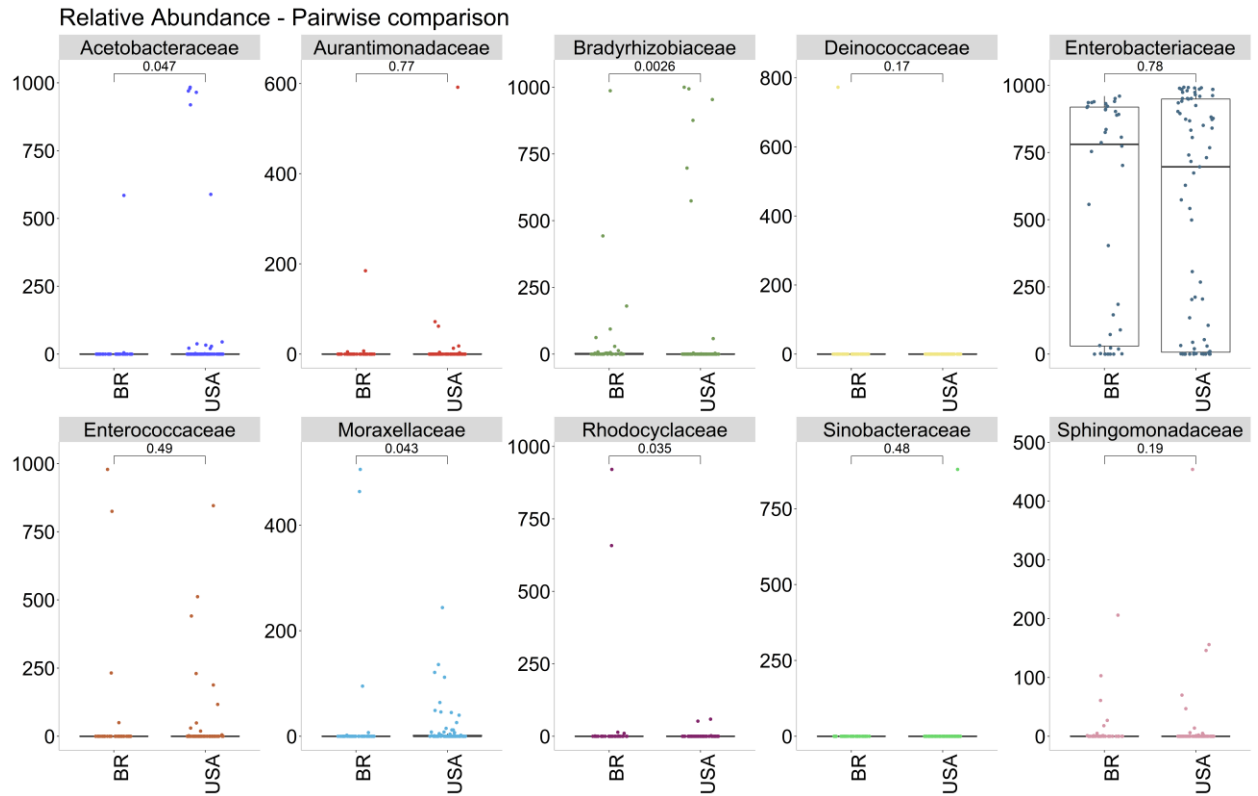

**Figure 5.** Abundance analysis of each bacteria family in the intestinal microbiome of *P. guildinii* collected in Brazil and the United States, classified by country. Pairwise comparison (Wilcoxon) is indicated between country.

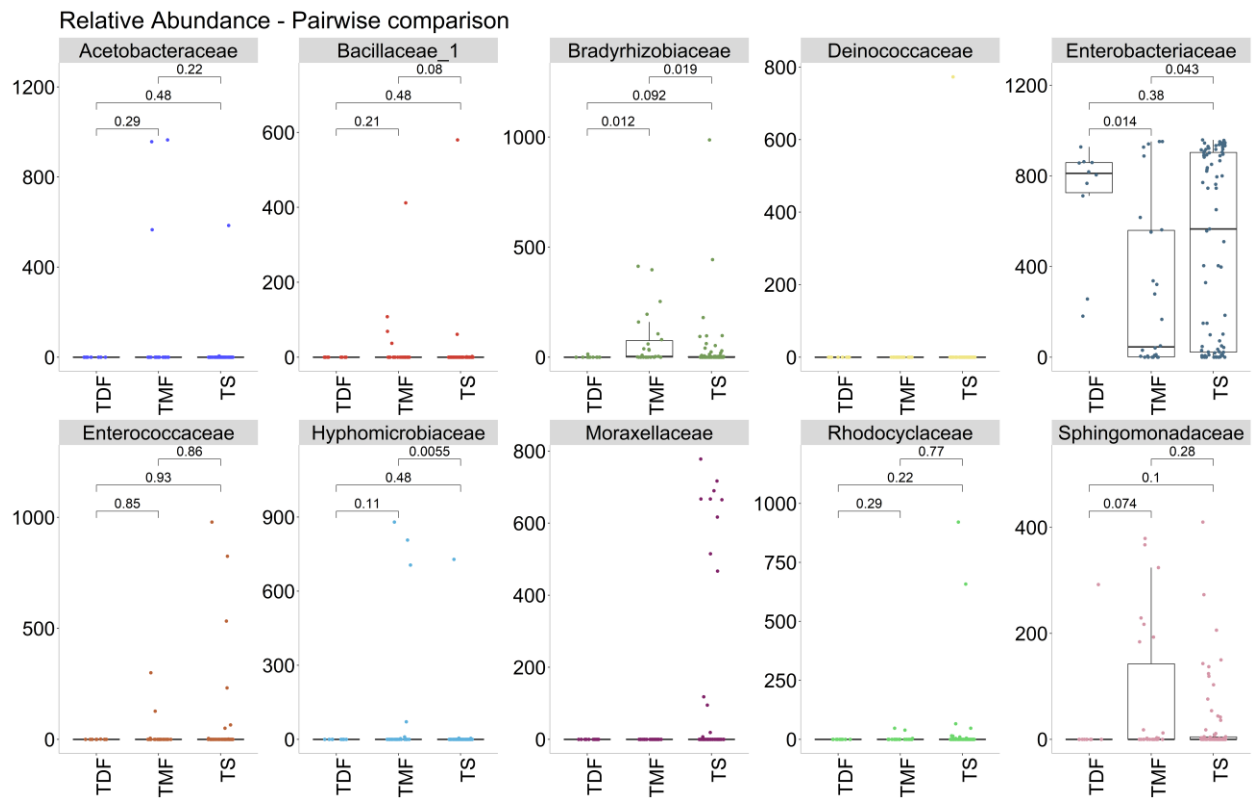

**Figure 6.** Abundance analysis of each bacteria family in the intestinal microbiome of *E. heros* and *P. guildinii* collected in Brazil, classified by ecoregions. Pairwise comparison (Wilcoxon) is indicated between ecoregions.

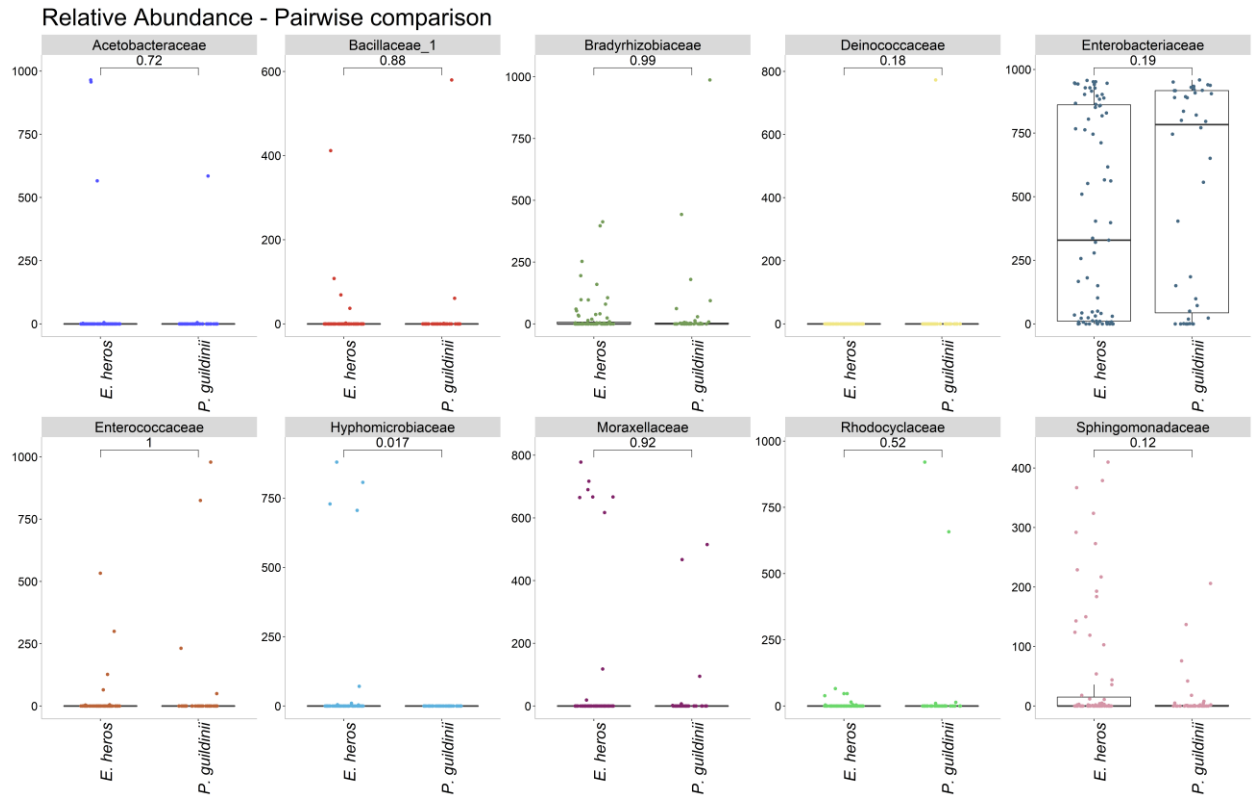

**Figure 7.** Abundance analysis of each bacteria family in the intestinal microbiome of *E. heros* and *P. guildinii* collected in Brazil, classified by species. Pairwise comparison (Wilcoxon) is indicated between species.
